# Supplementary material for: Highly dispersed noble metal nanoparticle composites on biomass-derived carbon-based carriers: synthesis, characterization, and catalytic applications
Source: Royal Society of Chemistry journal article supplement (doi:10.1039/d4ra03971h), 2024-01-01
Supplement: d4ra03971h1.pdf [file d4ra03971h1.pdf]

## Supporting Information

### Highly Dispersed Noble Metal Nanoparticle Composites on Biomass-Derived Carbon-Based Carriers: Synthesis, Characterization, and Catalytic Applications

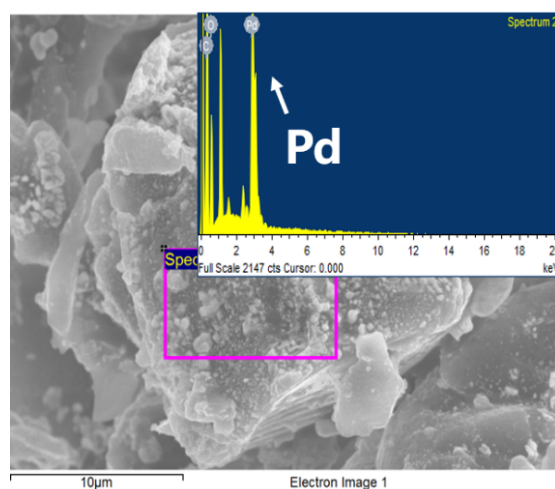

**Fig. S1.** EDS spectrum under SEM of Pd/p-C nanocomposites.

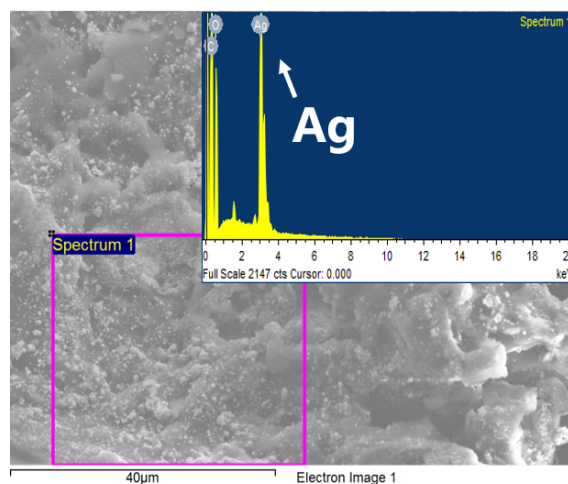

**Fig. S2.** EDS spectrum under SEM of Ag/p-C nanocomposites.

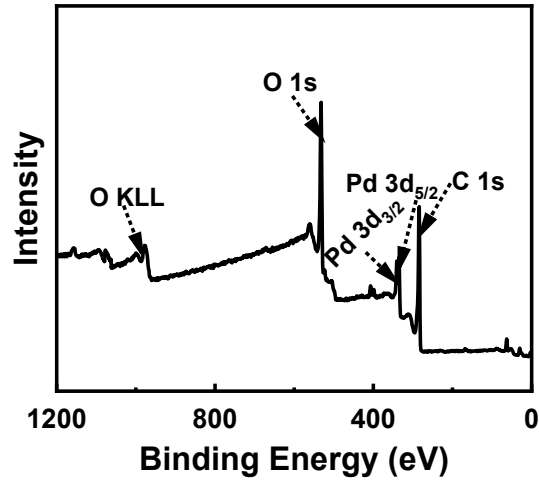

Fig. S3. XPS surveys of Pd/p-C nanocomposites.

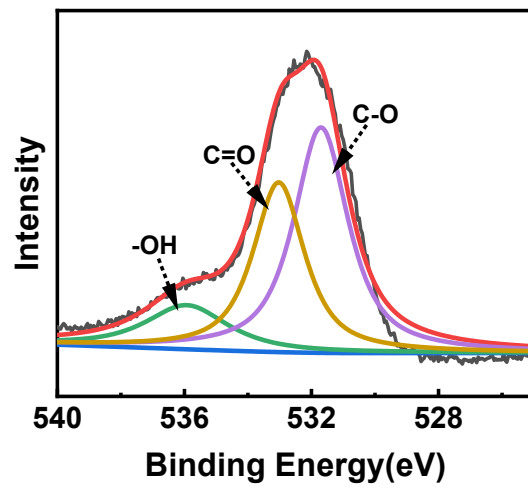

Fig. S4. High-resolution O 1s XPS spectra of Pd/p-C nanocomposites.

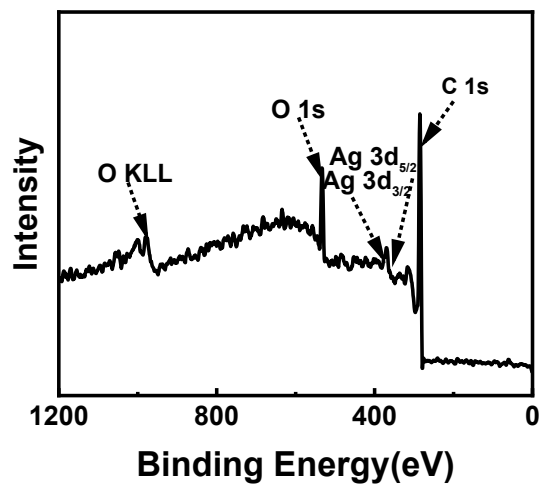

Fig. S5. XPS surveys of Ag/p-C nanocomposites.

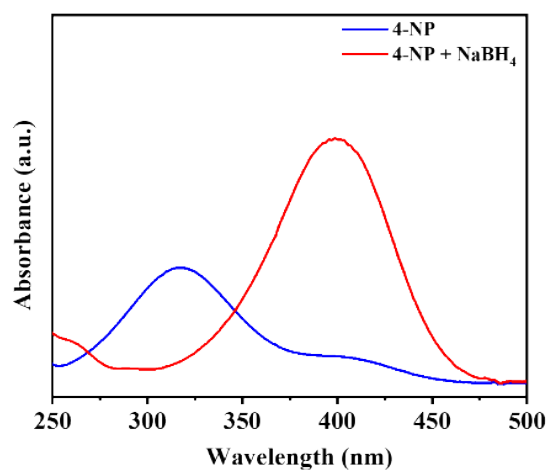

**Fig. S6.** UV-vis absorption spectra of 4-NP and 4-NP added into NaBH<sub>4</sub> solution.

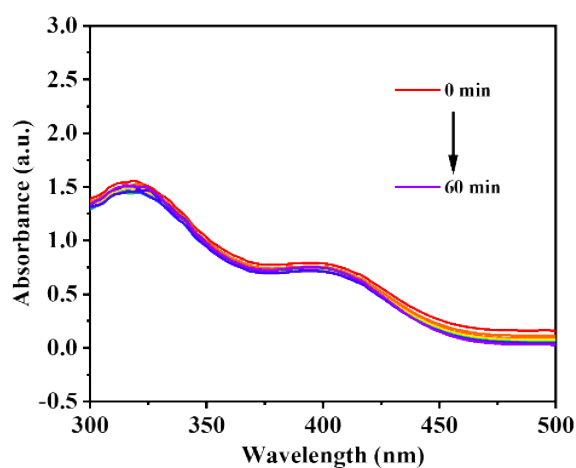

**Fig. S7.** UV-vis absorption spectra of the catalyst and 4-NP mixed solutions under the same conditions.

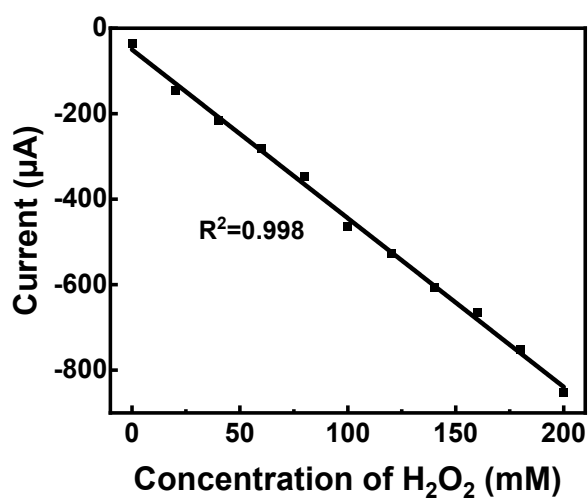

**Fig. S8.** Linear fitting program of the reduction peak currents with the H<sub>2</sub>O<sub>2</sub> concentrations of Pd/p-C nanocomposites.

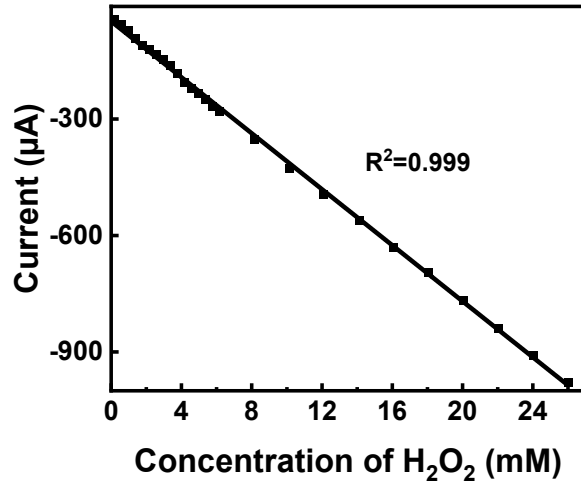

**Fig. S9.** Linear fitting program of the reduction peak currents with the H<sub>2</sub>O<sub>2</sub> concentrations of Ag/p-C nanocomposites.

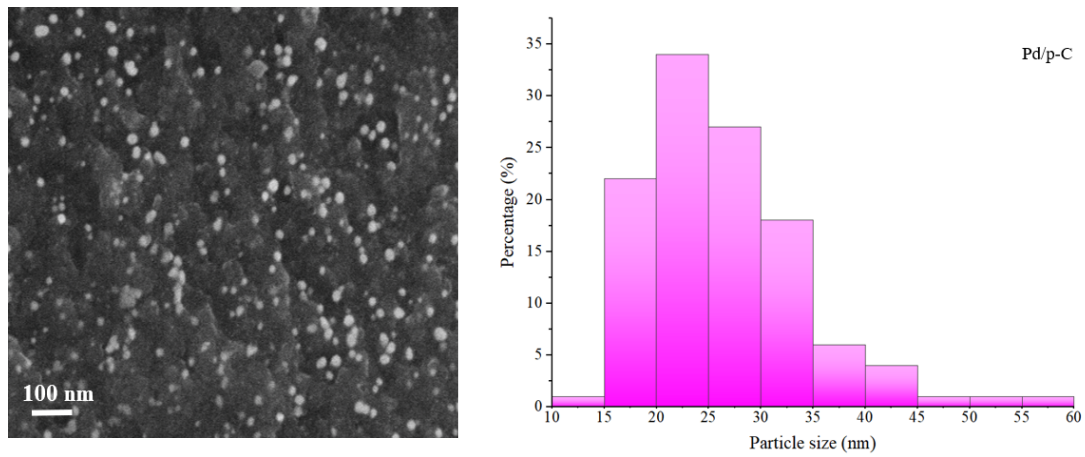

**Fig. S10.** SEM of Pd/p-C nanocomposites.

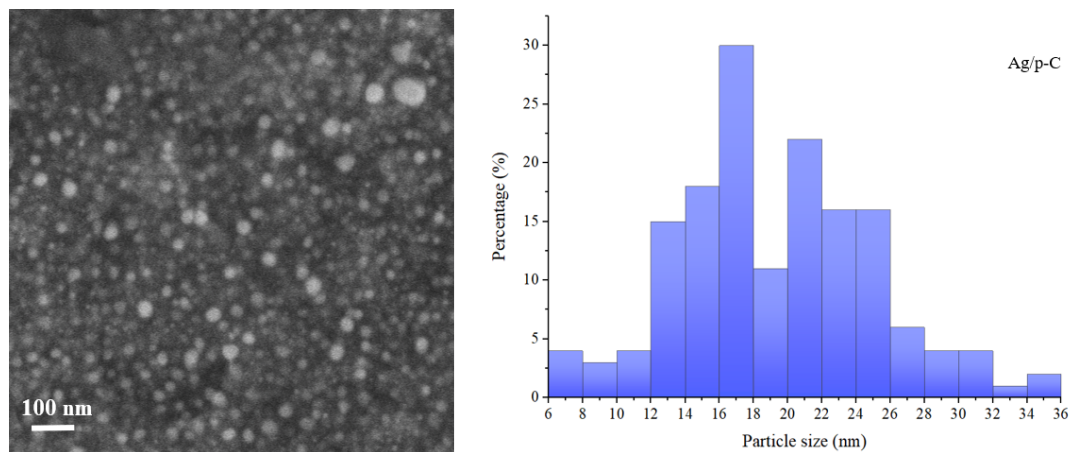

**Fig. S11.** SEM of Ag/p-C nanocomposites.

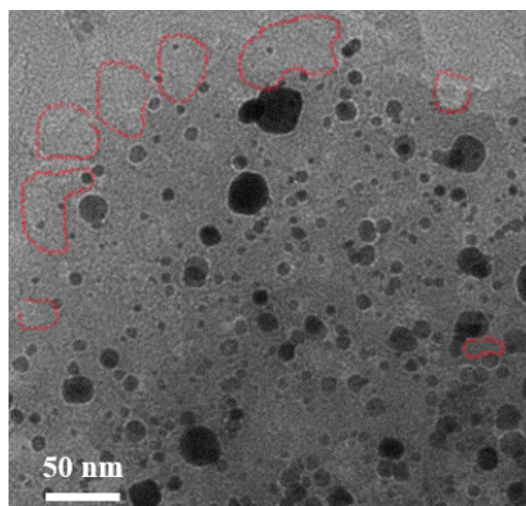

**Fig. S12.** TEM of Pd/p-C nanocomposites.

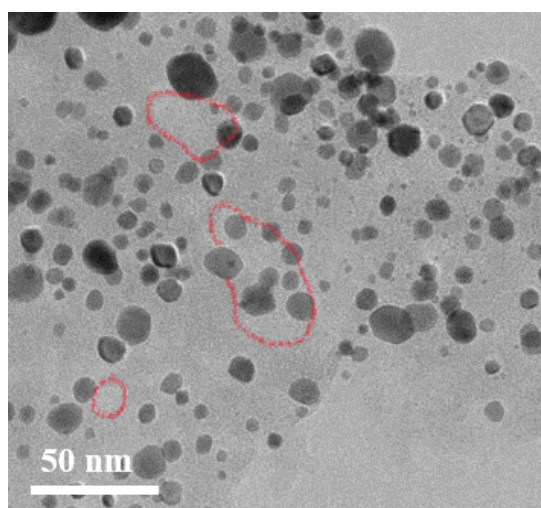

**Fig. S13.** TEM of Ag/p-C nanocomposites.

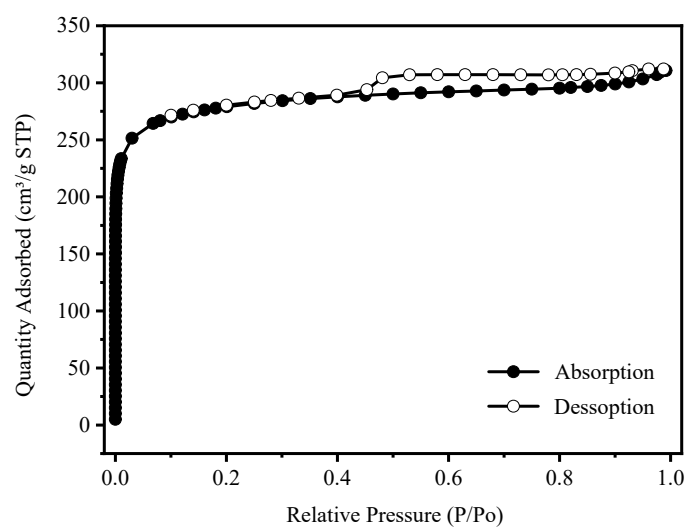

**Fig. S14** N<sub>2</sub> adsorption and desorption curves of Ag/p-C nanocomposites at 77K.
